# Supplementary material for: Unexpected stability of aqueous dispersions of raspberry-like colloids
Source: PubMed Central journal article supplement (PMC6127241; doi:10.1038/s41467-018-05560-3), 2018-09-06
Supplement: 41467_2018_5560_MOESM2_ESM.pdf [file 41467_2018_5560_MOESM2_ESM.pdf]

### **Description of Additional Supplementary Files**

File Name: Supplementary Movie 1

Description: TEM images rendered into a video demonstrating the 3D structure of a raspberry colloid.

File Name: Supplementary Movie 2

Description: Microscopy video showing the drying of emulsion droplets containing smooth, 280 nm large PS colloids - below a critical size these droplets disintegrate.
